# Supplementary material
Source: PubMed Central journal article supplement (PMC6399747)

Supplementary Figure 1: Extended Data Figure 1B full gel

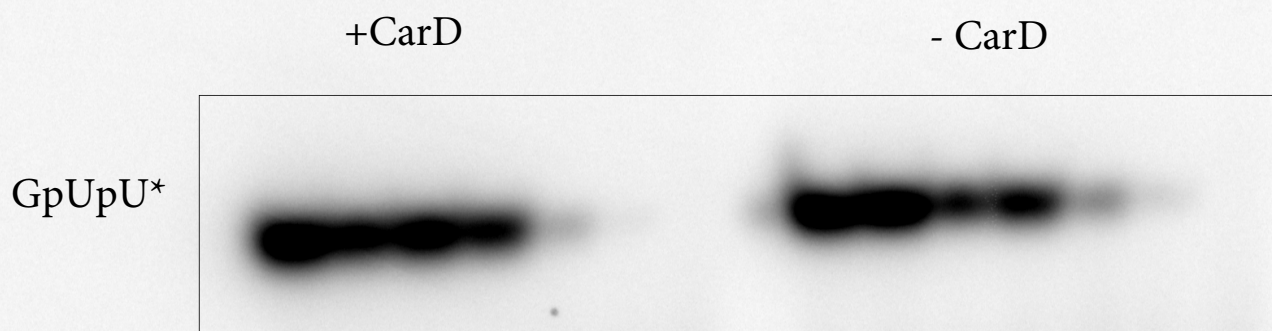

Supplement: NIHMS1007841-supplement-supplemental_figure_1.pdf [file NIHMS1007841-supplement-supplemental_figure_1.pdf]
